# Supplementary material for: Occupational Disruptions during the COVID-19 Pandemic and Their Association with Healthcare Workers’ Mental Health
Source: Int J Environ Res Public Health. 2021 Sep 2;18(17):9263. doi: 10.3390/ijerph18179263 (PMC8431156; doi:10.3390/ijerph18179263)
Supplement: Supplementary file 1 [file ijerph-18-09263-s001.zip › table S1.pdf]

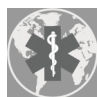

Supplementary Materials:

**Supplementary Table 1: Predictors of mental health outcomes**

| Characteristics                            | Anxiety          |       | Depression       |       | PTSD             |        | Depersonalisation |       | Emotional Exhaustion |       | Personal Achievement |       |
|--------------------------------------------|------------------|-------|------------------|-------|------------------|--------|-------------------|-------|----------------------|-------|----------------------|-------|
|                                            | OR (95% CI)      | p     | OR (95% CI)      | p     | OR (95% CI)      | p      | OR (95% CI)       | p     | OR (95% CI)          | p     | OR (95% CI)          | p     |
| Professional Predictors                    |                  |       |                  |       |                  |        |                   |       |                      |       |                      |       |
| Increased Unpaid Hours                     |                  | N/A   | 0.98 (0.81-1.19) | 0.863 |                  | N/A    |                   | N/A   | 1.35 (1.11-1.64)     | 0.003 | 1.27 (1.05-1.53)     | 0.015 |
| No Change                                  |                  | N/A   | 0.87 (0.74-1.03) | 0.096 | 0.79 (0.70-0.90) | 0.001  | 0.96 (0.85-1.09)  | 0.520 | 1.00 (0.86-1.17)     | 0.998 | 0.86 (0.74-1.01)     | 0.062 |
| Redeployed                                 |                  | N/A   | 1.24 (1.03-1.50) | 0.022 | 1.15 (0.97-1.36) | 0.098  | 1.02 (0.87-1.19)  | 0.831 |                      | N/A   |                      | N/A   |
| Role changed                               |                  | N/A   | 1.17 (0.99-1.38) | 0.065 | 1.42 (1.23-1.64) | <0.001 |                   | N/A   | 1.26 (1.08-1.47)     | 0.003 |                      | N/A   |
| Confident to Care for people with COVID-19 |                  |       |                  |       |                  |        |                   |       |                      |       |                      |       |
| unconfident                                | 0.98 (0.77-1.23) | 0.838 | 0.99 (0.77-1.26) | 0.902 | 1.02 (0.82-1.26) | 0.893  | 1.15 (0.92-1.43)  | 0.225 | 1.26 (0.98-1.62)     | 0.074 | 1.11 (0.88-1.39)     | 0.402 |
| confident                                  | 0.91 (0.75-1.11) | 0.364 | 0.86 (0.70-1.05) | 0.135 | 0.83 (0.70-0.98) | 0.032  | 1.13 (0.94-1.36)  | 0.181 | 0.97 (0.80-1.18)     | 0.764 | 1.01 (0.84-1.23)     | 0.897 |
| Confident in Using PPE                     |                  |       |                  |       |                  |        |                   |       |                      |       |                      |       |
| unconfident                                | 1.21 (0.90-1.62) | 0.203 | 0.84 (0.62-1.16) | 0.290 | 1.05 (0.79-1.39) | 0.728  | 1.17 (0.88-1.56)  | 0.278 | 1.31 (0.95-1.81)     | 0.099 | 0.90 (0.67-1.20)     | 0.469 |

|                                |                     |       |                     |       |                     |       |                     |        |                     |        |                  |       |
|--------------------------------|---------------------|-------|---------------------|-------|---------------------|-------|---------------------|--------|---------------------|--------|------------------|-------|
| confident                      | 0.79 (0.61-1.02)    | 0.068 | 0.89 (0.68-1.17)    | 0.404 | 0.84 (0.66-1.07)    | 0.148 | 1.05 (0.82-1.34)    | 0.701  | 1.20 (0.92-1.57)    | 0.187  | 1.31 (1.01-1.68) | 0.039 |
| Need Training                  | 1.047 (0.907-1.208) | 0.530 | 1.044 (0.900-1.213) | 0.568 |                     | N/A   | 1.21 (1.06-1.38)    | 0.005  |                     | N/A    |                  | N/A   |
| <b>Perception of workplace</b> |                     |       |                     |       |                     |       |                     |        |                     |        |                  |       |
| Communication received         | 0.874 (0.713-1.071) | 0.194 | 1.012 (0.815-1.255) | 0.917 | 0.893 (0.736-1.084) | 0.253 | 0.695 (0.573-0.843) | <0.001 | 0.902 (0.714-1.138) | 0.384  | 1.29 (1.05-1.58) | 0.015 |
| Organisational support         | 0.46 (0.38-0.56)    | 0.001 | 0.52 (0.42-0.63)    | 0.001 | 0.59 (0.49-0.71)    | 0.001 | 0.62 (0.51-0.75)    | <0.001 | 0.43 (0.34-0.55)    | <0.001 | 1.38 (1.13-1.68) | 0.001 |

PTSD: post-traumatic stress disorder.

Outcome comparators: anxiety, depression, PTSD, depersonalisation, emotional exhaustion (moderate to severe vs none to mild), personal achievement (moderate to high vs low).

Reference categories: increased unpaid hours (vs no change), no change (vs changed), redeployment (vs negative response), role change (vs no change), confidence to care (vs neutral), confidence in PPE (vs neutral), needs training (vs does not), perception of workplace (somewhat or very satisfied vs neutral or unsatisfied)
